# Supplementary material
Source: publisher site journal article supplement (https://www.spandidos-publications.com/8645/downloadSupplementary)
Supplement: Supplementary file 1 [file downloadSupplementary]

Figure S1. Zebrafish embryo and larvae development treated with *Centella asiatica* at 24, 48, 72 and 96 hpf. Images were captured using a stereo microscope at 40X (unhatched embryo) and 25X (for hatched embryo) magnification. DG, delayed gastrulation; LEB, lack of eye bud; TM, tail malformation; C, coagulation; NDT, non-detachment of the tail; PE, pericardial edema; YSE, yolk sac edema; ND, notochord deformation; N, normal.

| Extract concentration (µg/ml) | 24 hpf                                                                              | 48 hpf                                                                              | 72 hpf                                                                               | 96 hpf                                                                                |
|-------------------------------|-------------------------------------------------------------------------------------|-------------------------------------------------------------------------------------|--------------------------------------------------------------------------------------|---------------------------------------------------------------------------------------|
| 156.25                        | 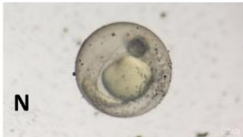   |    |    |    |
| 312.50                        |    |    |    |    |
| 625.00                        |    |    |    |    |
| 1,250.00                      |   |   |   |   |
| 2,500.00                      |  |  |  |  |
| 5,000.00                      |  |  |  |  |

Figure S2. Zebrafish embryo and larvae development treated with *Moringa oleifera* at 24, 48, 72 and 96 hpf. Images were captured using a stereo microscope at 40X (unhatched embryo) and 25X (for hatched embryo) magnification. DG, delayed gastrulation; LEB, lack of eye bud; C, coagulation; NDT, non-detachment of the tail; PE, pericardial edema; YSE, yolk sac edema; SM, spine malformation; N, normal.

| Extract concentration (µg/ml) | 24 hpf | 48 hpf | 72 hpf | 96 hpf |
|-------------------------------|--------|--------|--------|--------|
| 31.25                         |        |        |        |        |
| 62.50                         |        |        |        |        |
| 125.00                        |        |        |        |        |
| 250.00                        |        |        |        |        |
| 500.00                        |        |        |        |        |
| 1,000.00                      |        |        |        |        |

Figure S3. Zebrafish embryo and larvae development treated with *Curcuma longa* at 24, 48, 72 and 96 hpf. Images were captured using a stereo microscope at 40X (unhatched embryo) and 25X (for hatched embryo) magnification. DG, delayed gastrulation; LS, lack of somite; LEB, lack of eye bud; C, coagulation; NDT, non-detachment of the tail; PE, pericardial edema; YSE, yolk sac edema; SM, spine malformation; N, normal.

| Extract concentration (μg/ml) | 24 hpf                                                                              | 48 hpf                                                                              | 72 hpf                                                                               | 96 hpf                                                                                |
|-------------------------------|-------------------------------------------------------------------------------------|-------------------------------------------------------------------------------------|--------------------------------------------------------------------------------------|---------------------------------------------------------------------------------------|
| 156.25                        | 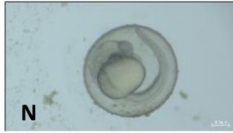   |    |    |    |
| 312.50                        |    |    |    |    |
| 625.00                        |    |    |    |    |
| 1,250.00                      |   |   |   |   |
| 2,500.00                      |  |  |  |  |
| 5,000.00                      |  |  |  |  |

Figure S4. Zebrafish embryo and larvae development treated with *Piper nigrum* at 24, 48, 72 and 96 hpf. Images were captured using a stereo microscope at 40X (unhatched embryo) and 25X (for hatched embryo) magnification. DG, delayed gastrulation; LS, lack of somite; C, coagulation; NDT, non-detachment of the tail; PE, pericardial edema; YSE, yolk sac edema; SM, spine malformation; TM, tail malformation; HM, head malformation; N, normal.

| Extract concentration (µg/ml) | 24 hpf                                                                              | 48 hpf                                                                              | 72 hpf                                                                               | 96 hpf                                                                                |
|-------------------------------|-------------------------------------------------------------------------------------|-------------------------------------------------------------------------------------|--------------------------------------------------------------------------------------|---------------------------------------------------------------------------------------|
| 31.25                         | 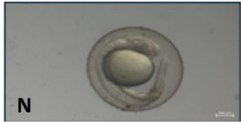   |    |    |    |
| 62.50                         |    |    |    |    |
| 125.00                        |    |    |    |    |
| 250.00                        |   |   |   |   |
| 500.00                        |  |  |  |  |
| 1,000.00                      |  |  |  |  |

Figure S5. Zebrafish embryo and larvae development treated with *Channa striata* at 24, 48, 72 and 96 hpf. Images were captured using a stereo microscope at 40X (unhatched embryo) and 25X (for hatched embryo) magnification. DG, delayed gastrulation; LEB, lack of eye bud; C, coagulation; NDT, non-detachment of the tail; PE, pericardial edema; YSE, yolk sac edema; SM, spine malformation; N, normal.

| Extract concentration (µg/ml) | 24 hpf         | 48 hpf  | 72 hpf  | 96 hpf        |
|-------------------------------|----------------|---------|---------|---------------|
| 31.25                         | <br>N          | <br>N   | <br>N   | <br>N         |
| 62.50                         | <br>N          | <br>N   | <br>N   | <br>N         |
| 125.00                        | <br>LEB        | <br>YSE | <br>N   | <br>N         |
| 250.00                        | <br>NDT        | <br>YSE | <br>YSE | <br>SM        |
| 500.00                        | <br>NDT        | <br>NDT | <br>YSE | <br>YSE<br>SM |
| 1,000.00                      | <br>LEB<br>NDT | <br>DG  | <br>C   | <br>C         |
